# Supplementary material for: Worldwide prevalence, risk factors and psychological impact of infertility among women: a systematic review and meta-analysis
Source: HighWire-hosted journal article supplement (doi:10.1136/bmjopen-2021-057132), 2022-03-01
Supplement: bmjopen-2021-057132supp001_data_supplement.pdf [file bmjopen-2021-057132supp001_data_supplement.pdf]

## Search strategy

### PubMed

1. infertil\*[Title/Abstract]
2. prevalence[Title/Abstract]
3. (#1) AND (#2)
4. risk factor
5. (#1) AND (#4)
6. psycholog\*
7. mental
8. quality of life
9. anxiety
10. depression
11. stress
12. (((((#6) OR (#7)) OR (#8)) OR (#9)) OR (#10)) OR (#11))
13. (#1) AND (#12)

### ScienceDirect

infertility

infertility AND prevalence

infertility AND risk factor

infertility AND (psycholog/ OR mental OR quality of life OR anxiety OR depression OR stress)
